# Supplementary material
Source: Research Square preprint supplement (doi:10.21203/rs.3.rs-8940853/v1)
Supplement: Supplementary file 1 [file 2d17b184023cb7c415fcc5de.docx]

**Supplementary:**

**Table S1.** Annotated population input data used to reconstruct long-term dynamics of the reintroduced *Parnassius apollo* population in Štramberk (1986–2024).

| **Year** | **Estimated adult abundance (*N*)** | **Semi-quantitative scale (*AB_semi100*)** | **Source** | **Method / key annotation (comparability)** |
| --- | --- | --- | --- | --- |
| 1986 | 10 | excluded | Kudrna et al. (1994); Lukášek (1998) | Supplementation phase (captive rearing/releases). |
| 1987 | 40 | excluded | Kudrna et al. (1994); Lukášek (1998); Lukášek & Moravec (2002) | Supplementation phase; releases across multiple sites. |
| 1988 | 50 | excluded | Kudrna et al. (1994); Lukášek (1998) | Supplementation phase; transition to semi-natural insectary rearing (method shift). |
| 1989 | 200 | excluded | Kudrna et al. (1994); Lukášek (1998) | Supplementation phase; insectary-based breeding reported. |
| 1990 | 250 | excluded | Kudrna et al. (1994) | Supplementation phase. |
| 1991 | 400 | excluded | Kudrna et al. (1994); Lukášek (1998) | Supplementation phase; field pupae/larvae also recorded (per source). |
| 1992 | 600 | excluded | Kudrna et al. (1994); Lukášek (1998) | Supplementation phase; strong weather constraints reported (per source). |
| 1993 | 600–700  (central ~650) | excluded | Lukášek (1998) | Spatial scope expanded beyond Kotouč (loc. D) to include Kamenárka (B, C) and Zámecký (A) vrch (per source). |
| 1994 | 1555 | 16 | Lukášek (1998); Lukášek (2002) | Start of modelling period; individual marking used; recording coverage estimated at ~65–70% (per source). |
| 1995 | 1100–1300  (central ~1200) | 12 | Kříž (2011) (citing Lukášek 1999) | Expert estimate reported as >1000 annually (range). |
| 1996 | 1500 | 15 | Kříž (2011) (citing Lukášek 1999) | Seasonal estimate. |
| 1997 | 2100 | 21 | Lukášek & Moravec (2002); Lukášek (2002); Fric et al. (2022) | Peak year (>2000 adults) consistently reported across sources. |
| 1998 | 1600 | 16 | Lukášek (2002) | Reported count/estimate. |
| 1999 | 1300 | 13 | Fric et al. (2022) | Reported estimate. |
| 2000 | 602 | 7 | Lukášek (2002) | Reported count. |
| 2001 | 600 | 6 | Lukášek (2002) | Reported estimate. |
| 2002 | 600 | 6 | Lukášek (2002) | Reported estimate. |
| 2003 | 150–400 (central ~350) | 4 | R. Schneider (2025, *pers. comm*.) | Expert interval estimate. |
| 2004 | 150 | 2 | R. Schneider (2025, *pers. comm*.) | Effort-based expert estimate (1–10 visits/season; daily maxima typically 50–80; per source). |
| 2005 | 250 | 3 | R. Schneider (2025, *pers. comm*.) | Effort-based expert estimate (1–10 visits/season; daily maxima typically 50–80; per source). |
| 2006 | 120 | 2 | Fric et al. (2022) | Reported estimate. |
| 2007 | 35 | 1 | Fric et al. (2022) | Low tens reported across multiple micro-sites (per source). |
| 2008 | 150 | 2 | R. Schneider (2025, *pers. comm*.) | Effort-based expert estimate (1–10 visits/season; daily maxima typically 50–80; per source). |
| 2009 | NA | NA | — | No reliable data available; year omitted. |
| 2010 | NA | NA | — | No reliable data available; year omitted. |
| 2011 | NA | NA | — | No reliable data available; year omitted. |
| 2012 | NA | NA | — | No reliable data available; year omitted. |
| 2013 | NA | NA | — | No reliable data available; year omitted. |
| 2014 | 40 | 1 | M. Polák (2025, *pers. comm*.) | Effort-based observation; treated as seasonal expert estimate (per source). |
| 2015 | 150 | 2 | J. Schneider (2025, *pers. comm*.) | Expert seasonal assessment; episodic increase reported (per source). |
| 2016 | 90 | 1 | R. Schneider (2025, *pers. comm*.) | Effort-based expert estimate (per source). |
| 2017 | 50–70 (central ~60) | 1 | M. Kostelník (2025, *pers. comm*.) | Encounter rate reported (~5 individuals/hour of search effort; per source). |
| 2018 | 40–60 (central ~50) | 1 | M. Kostelník (2025, *pers. comm*.) | Encounter rate reported (~4 individuals/hour of search effort; per source). |
| 2019 | NA | NA | — | No reliable data available; year omitted. |
| 2020 | NA | NA | — | No reliable data available; year omitted. |
| 2021 | 30 | 1 | Fric et al. (2022) | Adults reported in low tens (per source). |
| 2022 | 30 | 1 | R. Schneider (2024, *pers. comm*.); Fric et al. (2022); *pers. observ.* | Adults in low tens; larval abundance also recorded (~160 larvae; Schneider 2024). |
| 2023 | 60 | 1 | R. Schneider (2024, *pers. comm*.); Číp (2023); *pers. observ.* | Expert estimate. |
| 2024 | 40 | 1 | R. Schneider (2024, *pers. comm*.); *pers. observ.* | Expert estimate. |

Note: *N* = reported/estimated abundance of adults, unless stated otherwise. *AB_semi100* = semi-quantitative ordinal class with 100-individual increments (1 = 1–100, 2 = 101–200, …). For interval estimates, *AB_semi100* was assigned using the central estimate. Years 1986–1993 represent the supplementation phase and were excluded from environmental modelling. Years 2009–2013 and 2019–2020 were omitted because no reliable population size data were available (shown as NA). Sources cited as "Lukášek (1998, 1999, 2002)", "Fric et al. (2022)“ and "Lukášek & Moravec (2002)" refer to unpublished technical reports and monitoring summaries submitted to the Nature Conservation Agency of the Czech Republic (NCA CR).

**Table S2** Complete model selection and parameter estimates for all candidate ordinal logistic regression models of the reintroduced Apollo butterfly (*Parnassius apollo*) population in Štramberk (Czech Republic)

| **Scenario** | **Model** | **Predictor** | ***β* (SE)** | **OR** | **95% CI (OR)** | ***p*-value** | ***n*** | ***k*** |
| --- | --- | --- | --- | --- | --- | --- | --- | --- |
| **A. Without year control:** | NDVI | NDVI (z-score) | –1.96 (0.53) | 0.14 | 0.05–0.40 | <0.001 | 24 | 12 |
|  | T_avg | T_avg (z-score) | –1.51 (0.45) | 0.22 | 0.09–0.53 | <0.001 | 24 | 12 |
|  | H_spring | H_spring (z-score) | 1.32 (0.42) | 3.74 | 1.64–8.53 | 0.002 | 24 | 12 |
|  | S_ann | S_ann (z-score) | –0.94 (0.41) | 0.39 | 0.17–0.88 | 0.023 | 24 | 12 |
|  | BIO10 | BIO10 (z-score) | –0.80 (0.41) | 0.45 | 0.20–1.00 | 0.05 | 24 | 12 |
|  | BIO17 | BIO17 (z-score) | –0.34 (0.35) | 0.71 | 0.36–1.40 | 0.323 | 24 | 12 |
|  | BIO14 | BIO14 (z-score) | –0.35 (0.36) | 0.7 | 0.35–1.42 | 0.327 | 24 | 12 |
| **B. With year control:** | year | Year (per +1 year) | –0.23 (0.06) | 0.79 | 0.71–0.89 | <0.001 | 24 | 12 |
|  | year + BIO17 | BIO17 (z-score) | –0.97 (0.46) | 0.38 | 0.15–0.94 | 0.036 | 24 | 13 |
|  | year + BIO17 | Year (per +1 year) | –0.26 (0.06) | 0.77 | 0.68–0.87 | <0.001 | 24 | 13 |
|  | year + T_avg | T_avg (z-score) | –0.89 (0.50) | 0.41 | 0.15–1.08 | 0.071 | 24 | 13 |
|  | year + T_avg | Year (per +1 year) | –0.19 (0.06) | 0.82 | 0.73–0.93 | 0.002 | 24 | 13 |
|  | year + BIO14 | BIO14 (z-score) | –0.73 (0.40) | 0.48 | 0.22–1.06 | 0.07 | 24 | 13 |
|  | year + BIO14 | Year (per +1 year) | –0.24 (0.06) | 0.78 | 0.69–0.88 | <0.001 | 24 | 13 |
|  | year + BIO10 | BIO10 (z-score) | –0.59 (0.36) | 0.56 | 0.28–1.12 | 0.102 | 24 | 13 |
|  | year + BIO10 | Year (per +1 year) | –0.23 (0.06) | 0.8 | 0.71–0.90 | <0.001 | 24 | 13 |
|  | year + H_spring | H_spring (z-score) | 0.68 (0.46) | 1.98 | 0.81–4.84 | 0.134 | 24 | 13 |
|  | year + H_spring | Year (per +1 year) | –0.20 (0.06) | 0.82 | 0.73–0.93 | 0.002 | 24 | 13 |
|  | year + S_ann | S_ann (z-score) | –0.50 (0.41) | 0.6 | 0.27–1.35 | 0.219 | 24 | 13 |
|  | year + S_ann | Year (per +1 year) | –0.21 (0.06) | 0.81 | 0.72–0.91 | <0.001 | 24 | 13 |
|  | year + NDVI | NDVI (z-score) | 1.39 (1.87) | 4.02 | 0.10–157.60 | 0.457 | 24 | 13 |
|  | year + NDVI | Year (per +1 year) | –0.37 (0.21) | 0.69 | 0.46–1.03 | 0.069 | 24 | 13 |

Note: Predictor codes follow Table 1. Candidate models represent the reduced set after collinearity filtering. *β* = coefficient (environmental predictors are z-standardized; year is on the original scale); SE = standard error; OR = odds ratio; CI = confidence interval; *p*-value = significance level; *n* = number of observations (years); *k* = number of estimated parameters (including ordinal thresholds). The high standard errors and non-significance in the "year + NDVI" model are attributed to extreme multicollinearity between these two predictors (*r* = 0.98).
